# Supplementary material for: Genetic components of human pain sensitivity: a protocol for a genome-wide association study of experimental pain in healthy volunteers
Source: PubMed Central journal article supplement (PMC6500241; doi:10.1136/bmjopen-2018-025530), 2019-04-20
Supplement: bmjopen-2018-025530supp001.pdf [file bmjopen-2018-025530supp001.pdf]

## Appendix 1: Demographic and Ancestry Questionnaire

1. Age (years):

2. Gender: female (0) male (1)

3. Do you consider yourself:

|                                           |  |
|-------------------------------------------|--|
| Black                                     |  |
| Mulatto                                   |  |
| Indigenous                                |  |
| Moreno (Brown skin)                       |  |
| Cobrizo (Coppery skin)                    |  |
| Mestizo (Mixed)                           |  |
| Pardo (Dark skin)                         |  |
| Blanco (White skin)                       |  |
| European                                  |  |
| Other (please describe in your own words) |  |

4. What ancestral proportions do you think you have? And in what proportions do you consider you have each of these components?

Mark with an X the percentage range you consider to have from each ancestry. If you believe you do not bear a specific ancestry, mark the range between 0-20%.

| Indigenous                    |  | Black                         |  | European                      |  |
|-------------------------------|--|-------------------------------|--|-------------------------------|--|
| 0-20%<br>(none – very low)    |  | 0-20%<br>(none – very low)    |  | 0-20%<br>(none – very low)    |  |
| 20-40%<br>(low)               |  | 20-40%<br>(low)               |  | 20-40%<br>(low)               |  |
| 40-60%<br>(medium)            |  | 40-60%<br>(medium)            |  | 40-60%<br>(medium)            |  |
| 60-80%<br>(high)              |  | 60-80%<br>(high)              |  | 60-80%<br>(high)              |  |
| 80-100%<br>(very high - full) |  | 80-100%<br>(very high - full) |  | 80-100%<br>(very high - full) |  |

5. If you believe that you have another ancestral component (ancestors from other races), please let us know which ones:
